# Supplementary material
Source: ML conference proceedings conference paper supplement (https://www.ecva.net/papers/eccv_2020/papers_ECCV/html/123680290_ECCV_2020_paper.php)
Supplement: Supplementary file 1 [file 123680290-supp.pdf]

# Supplemental Material: Spatial-Angular Interaction for Light Field Image Super-Resolution

Yingqian Wang<sup>1</sup>, Longguang Wang<sup>1</sup>, Jungang Yang<sup>1</sup>,  
Wei An<sup>1</sup>, Jingyi Yu<sup>2</sup>, and Yulan Guo<sup>1,3</sup>

<sup>1</sup>National University of Defense Technology,

<sup>2</sup>ShanghaiTech University, <sup>3</sup>Sun Yat-sen University.

{wangyingqian16, yangjungang, yulan.guo}@nudt.edu.cn

Section **A** presents details of the light field (LF) reshape operation. Section **B** provides additional visual comparisons for  $2\times$  and  $4\times$ SR.

Table 1: Notations used in this supplemental material.

| Notation                                                    | Representation                      |
|-------------------------------------------------------------|-------------------------------------|
| $\mathcal{L} \in \mathbb{R}^{U \times V \times H \times W}$ | a 4D LF                             |
| $\mathcal{I}_{SAIs} \in \mathbb{R}^{UH \times VW}$          | a 2D SAI array                      |
| $\mathcal{I}_{MacPI} \in \mathbb{R}^{UH \times VW}$         | a 2D MacPI                          |
| $U, V \in \mathbb{Z}_+$                                     | angular size                        |
| $H, W \in \mathbb{Z}_+$                                     | spatial size                        |
| $u, v \in \mathbb{Z}_+$                                     | angular coordinate                  |
| $h, w \in \mathbb{Z}_+$                                     | spatial coordinate                  |
| $(x, y) \in \mathbb{Z}_+^2$                                 | coordinate in $\mathcal{I}_{SAIs}$  |
| $(\xi, \eta) \in \mathbb{Z}_+^2$                            | coordinate in $\mathcal{I}_{MacPI}$ |
| $\lfloor \cdot \rfloor$                                     | round-down operation                |

## A. Light Field Reshape

We use the notations in Table 1 for formulation. As shown in Fig. 1, an LF  $\mathcal{L} \in \mathbb{R}^{U \times V \times H \times W}$  can be organized into a macro-pixel image (MacPI)  $\mathcal{I}_{MacPI} \in \mathbb{R}^{UH \times VW}$  or an array of sub-aperture images (SAIs)  $\mathcal{I}_{SAIs} \in \mathbb{R}^{UH \times VW}$ . The LF reshape operation is defined as the transformation between these two representations. To convert LFs from one representation to the other representation, the one-to-one mapping function between MacPI and SAIs needs to be built. Without loss of generality, we take spatial-to-angular reshape as an example, namely, to find point  $(\xi, \eta) \in \mathcal{I}_{MacPI}$  corresponding to a known point  $(x, y) \in \mathcal{I}_{SAIs}$ . We first calculate the angular coordinates  $u$  and  $v$  of point  $(x, y)$  according to

$$u = \lceil x/H \rceil = \lfloor x/H \rfloor + 1, \quad (1)$$

$$v = \lceil y/W \rceil = \lfloor y/W \rfloor + 1. \quad (2)$$

Using the angular coordinates, the spatial coordinates  $h$  and  $w$  can be derived by

$$h = x - (u - 1) \cdot H = x - \lfloor x/H \rfloor \cdot H, \quad (3)$$

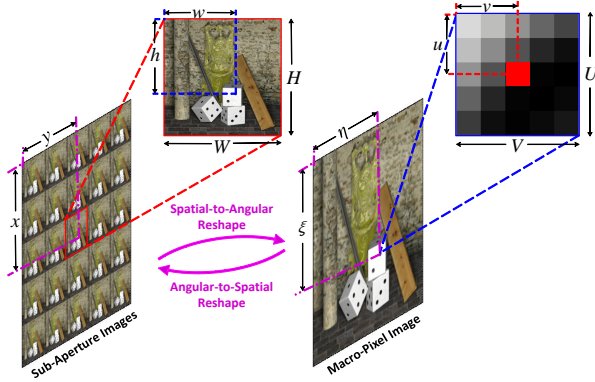

Fig. 1: An illustration of the LF reshape operation. Since the SAIs and the MacPI denote the same LF, the objective of LF reshape is to re-organize LFs between these two representations.

$$w = y - (v - 1) \cdot W = y - \lfloor y/W \rfloor \cdot W. \quad (4)$$

Since  $\mathcal{I}_{SAIs}$  and  $\mathcal{I}_{MacPI}$  represent the same LF,  $(x, y)$  and  $(\xi, \eta)$  in these two representations have the same spatial and angular coordinates. Therefore, we find  $(\xi, \eta)$  corresponding to  $(u, v, h, w)$  as follows:

$$\begin{aligned} \xi &= U \cdot (h - 1) + u \\ &= U \cdot (x - \lfloor x/H \rfloor \cdot H - 1) + \lfloor x/H \rfloor + 1 \\ &= U \cdot (x - 1) + \lfloor x/H \rfloor \cdot (1 - U \cdot H) + 1 \end{aligned} \quad (5)$$

$$\begin{aligned} \eta &= V \cdot (w - 1) + v \\ &= V \cdot (y - \lfloor y/W \rfloor \cdot W - 1) + \lfloor y/W \rfloor + 1 \\ &= V \cdot (y - 1) + \lfloor y/W \rfloor \cdot (1 - V \cdot W) + 1 \end{aligned} \quad (6)$$

The angular-to-spatial reshape can be derived following a similar approach:

$$\begin{aligned} x &= H \cdot (u - 1) + h \\ &= H \cdot (\xi - 1) + \lfloor \xi/U \rfloor \cdot (1 - U \cdot H) + 1 \end{aligned} \quad (7)$$

$$\begin{aligned} y &= W \cdot (v - 1) + w \\ &= W \cdot (\eta - 1) + \lfloor \eta/V \rfloor \cdot (1 - V \cdot W) + 1 \end{aligned} \quad (8)$$

Note that, Eqs. (9-10) in the main body of our manuscript can be derived from the above equations (i.e., Eqs. (7-8)) by assigning  $A$  to  $U$  and  $V$ .

## B. Additional Visual Comparisons

Additional visual comparisons for  $2\times$  and  $4\times$ SR are shown in Figs. 2 and 3, respectively.

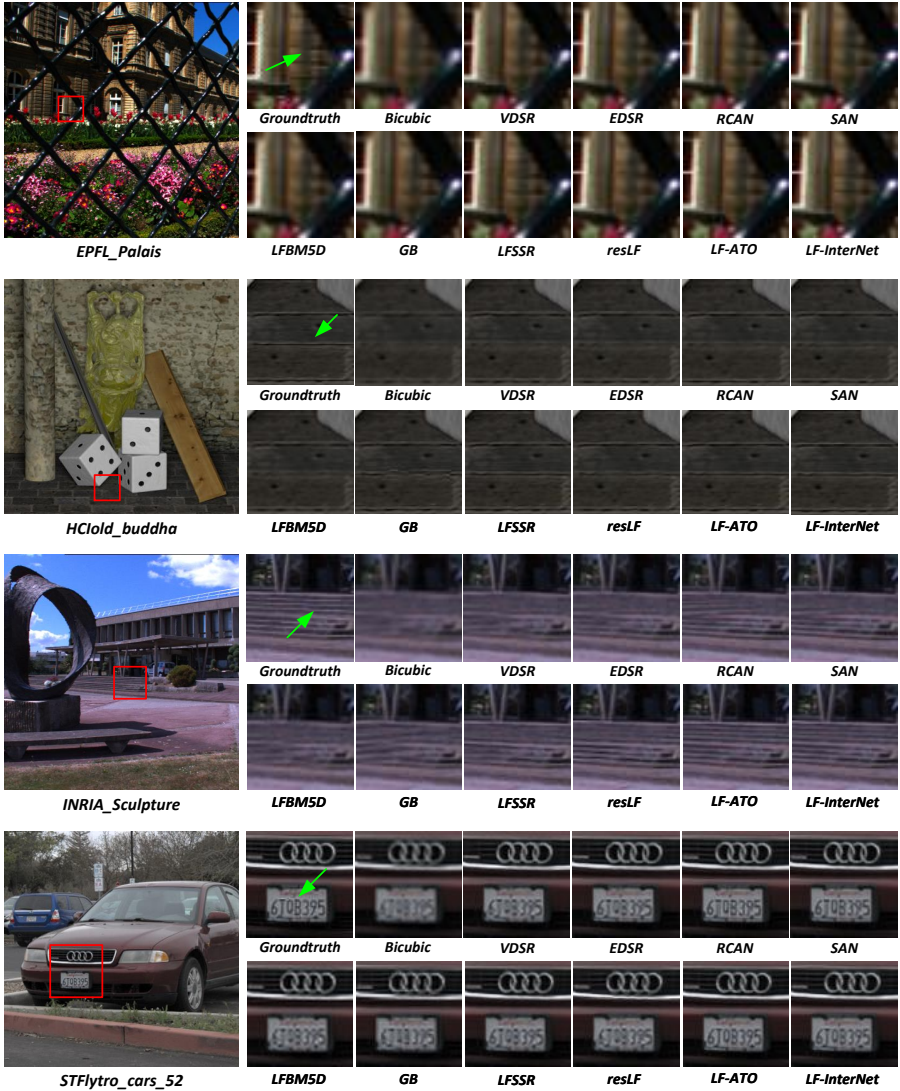Fig. 2: Additional visual results for  $2\times$ SR.

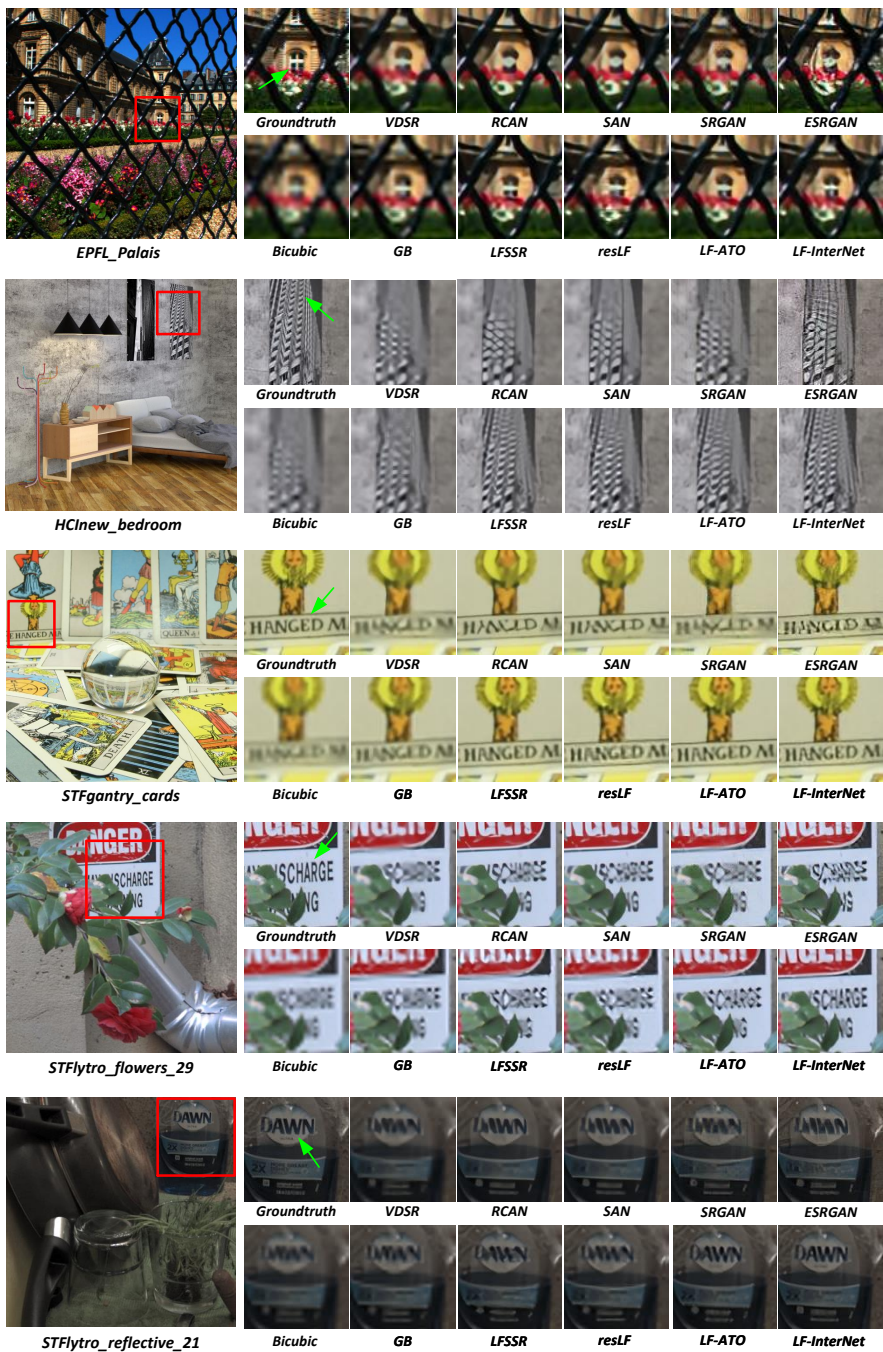

Fig. 3: Additional visual results for 4×SR.
